# Supplementary material
Source: PubMed Central journal article supplement (PMC8213452)
Supplement: deab135_supplementary_figure_s4.pdf [file deab135_supplementary_figure_s4.pdf]

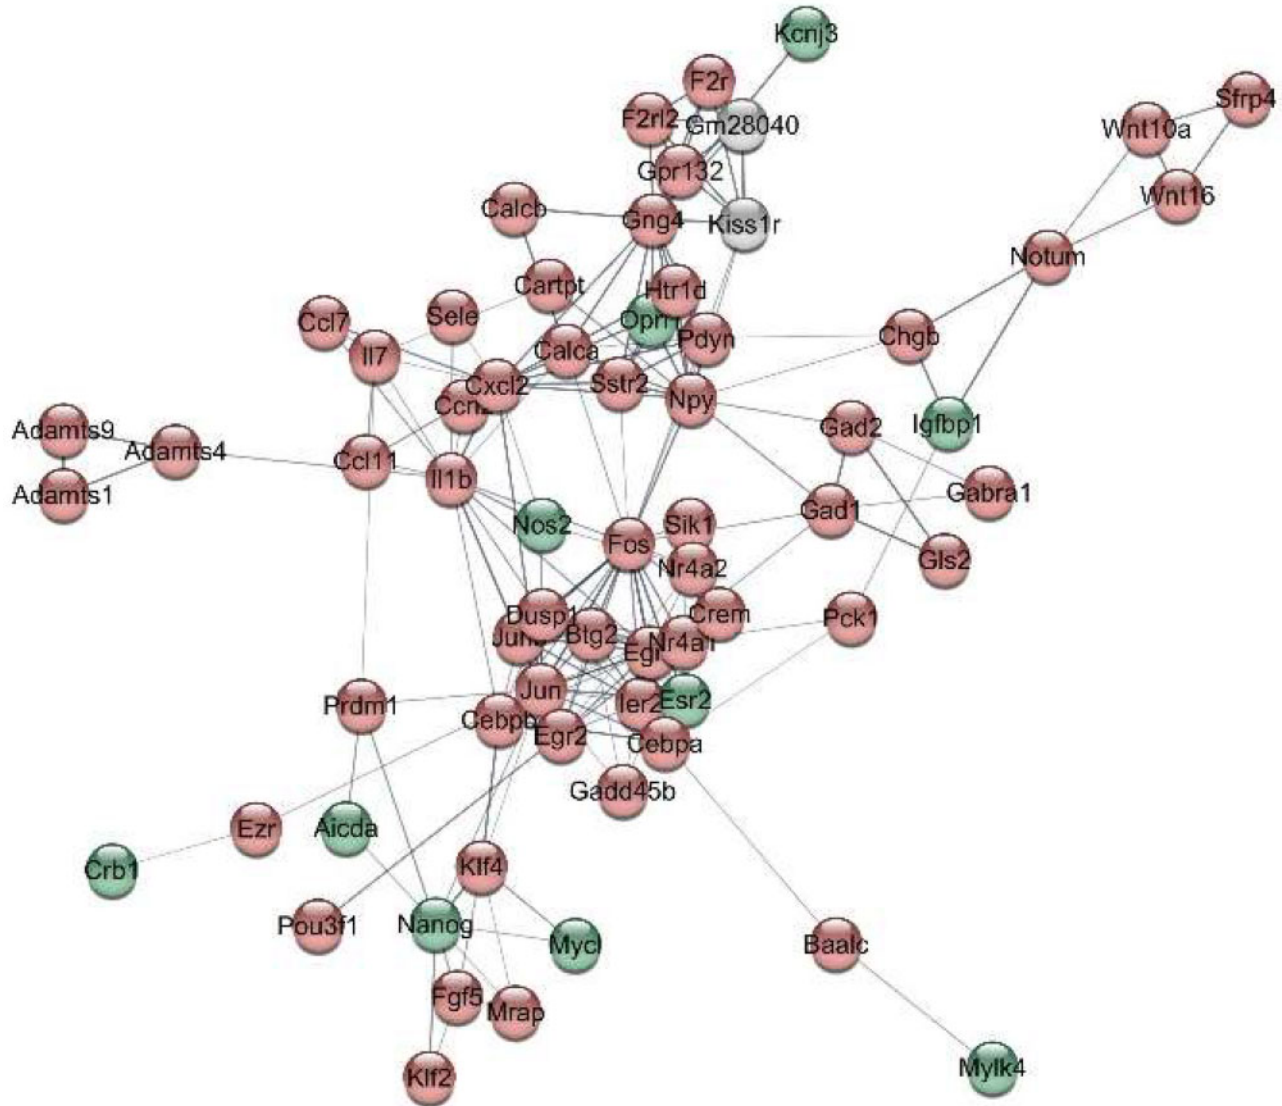

**Supplementary Figure S4. Protein–protein interaction (PPI) network (degree > 2) of DEGs of FSH18/21 treatment compared with control.** Gene expression data was derived from RNA-Sequencing analysis described in [Supplementary Fig. S3](#). The number of interacting partners of a protein in a PPI network is given by the degree of the node. The degree filter (degree > 2) was used to identify the relevant hub genes in the network. Red nodes represent upregulated genes. Green nodes represent downregulated genes.
