# Supplementary material
Source: PubMed Central journal article supplement (PMC8213452)
Supplement: deab135_supplementary_figure_s7.pdf [file deab135_supplementary_figure_s7.pdf]

human reproduction **SUPPLEMENTARY DATA**

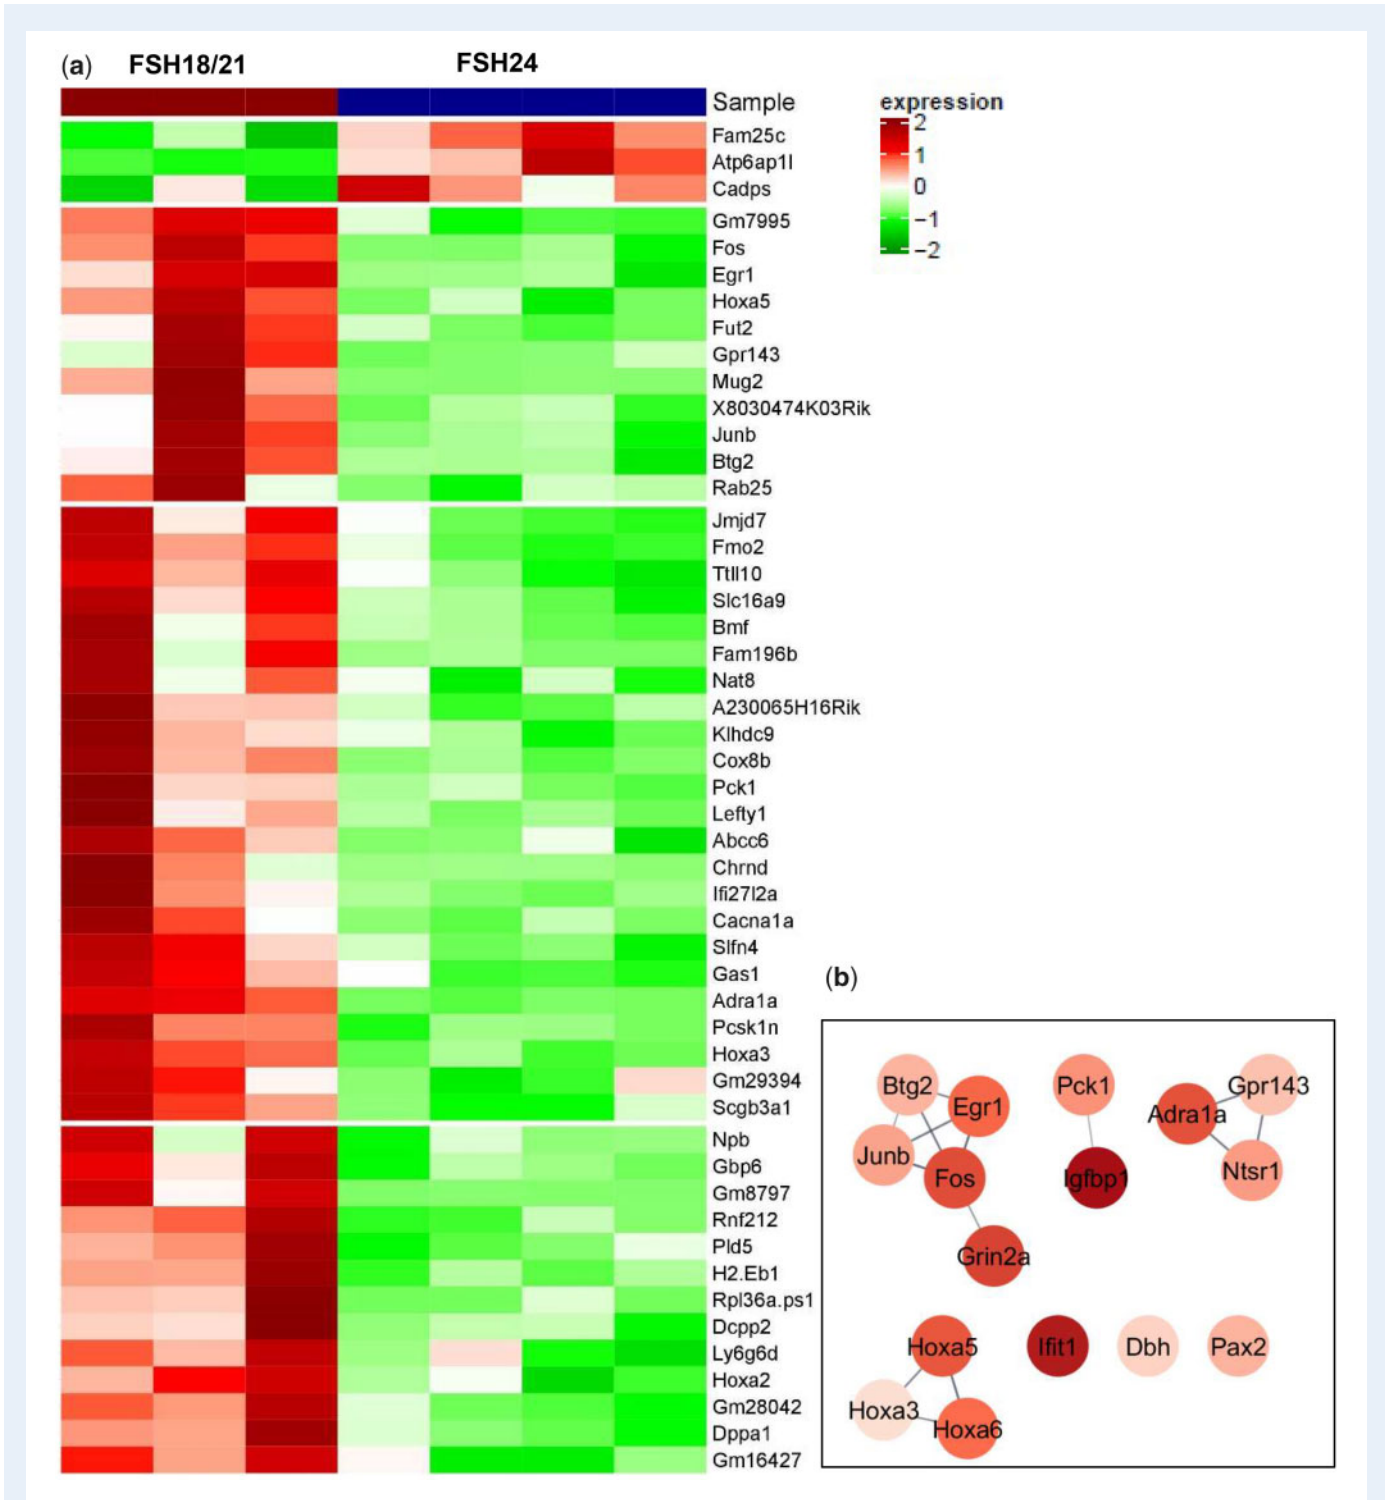

**Supplementary Figure S7. Differentially expressed genes (DEGs) and different pathways involved in the responses to hFSH18/21 and hFSH24 treatment.** (a) Heatmap of the top 50 DEGs between FSH18/21 and FSH24 treatment ( $P < 0.05$ ,  $\log_2FC \geq 1.5$ ). (b) Protein–protein interaction (PPI) network (degree  $> 2$ ) of DEGs of FSH18/21 treatment compared with FSH24 treatment. Red nodes represent upregulated genes ( $P < 0.05$ ).
