# Supplementary material
Source: PubMed Central journal article supplement (PMC8213452)
Supplement: deab135_supplementary_figure_s8.pdf [file deab135_supplementary_figure_s8.pdf]

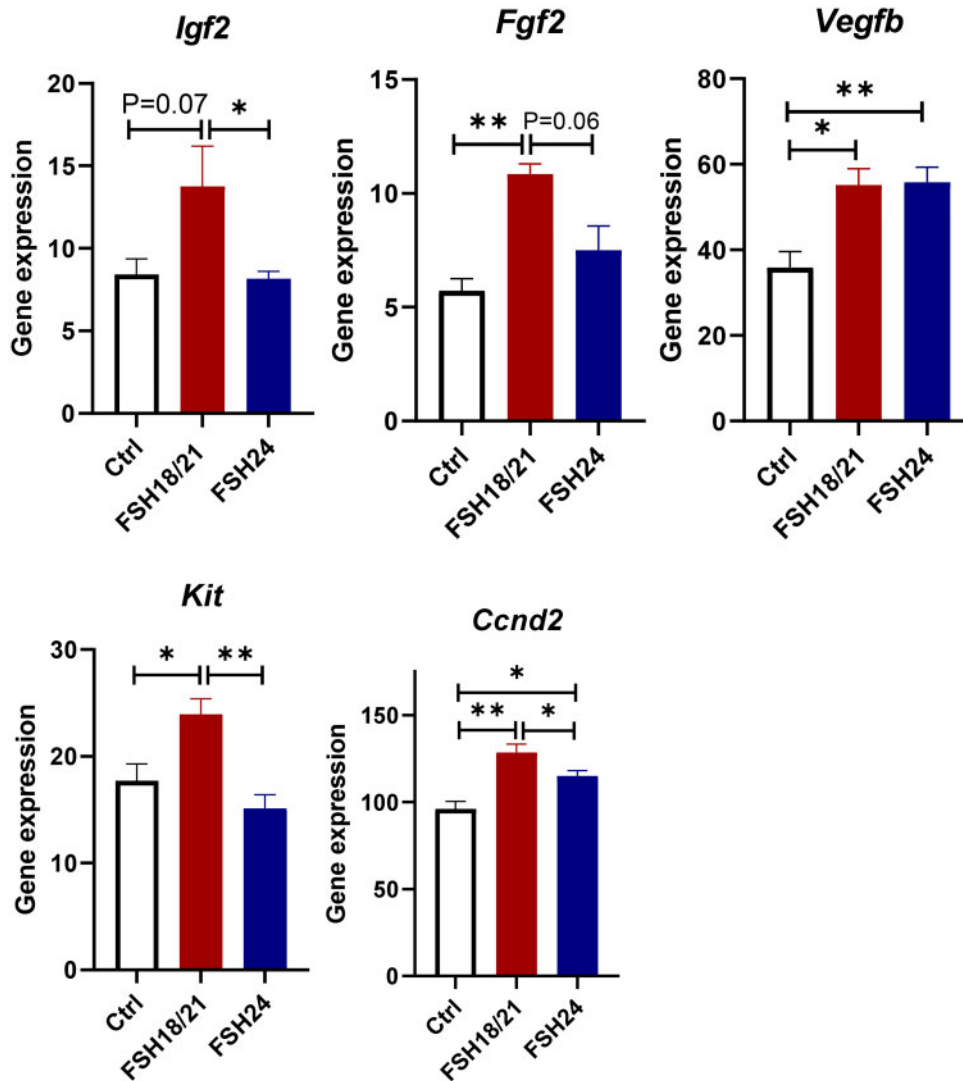

**Supplementary Figure S8. Growth factors and cell proliferation gene expression levels in different treatment groups after 2 h treatment.** Gene expression data was derived from RNA-Sequencing analysis described in [Supplementary Fig. S3](#). Each bar represents means  $\pm$  SEM of gene expression levels of control (Ctrl), FSH18/21, or FSH24 group. Each group contained 3 to 4 animals. \* $P < 0.05$ ; \*\* $P < 0.01$ .
