# Supplementary material
Source: PubMed Central journal article supplement (PMC8213452)
Supplement: deab135_supplementary_figure_s9.pdf [file deab135_supplementary_figure_s9.pdf]

human reproduction **SUPPLEMENTARY DATA**

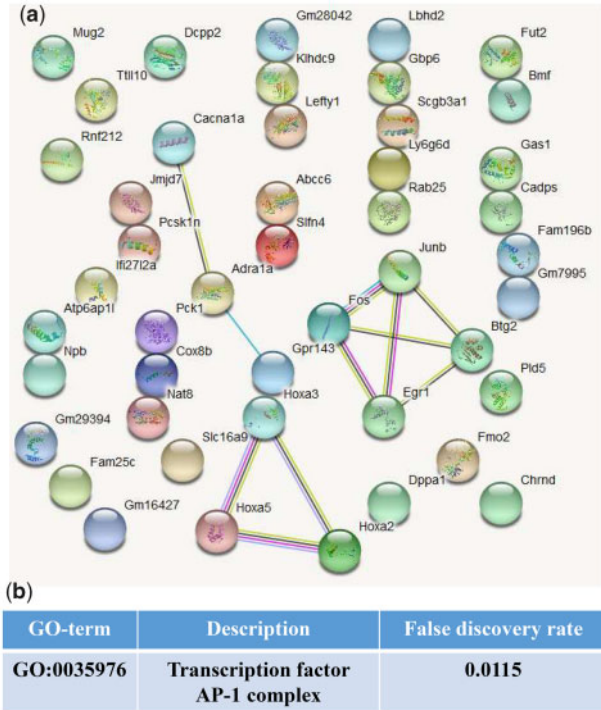

**Supplementary Figure S9. String analysis of top 50 differentially expressed genes (DEGs) of FSH18/21 versus FSH24. a. Protein-protein interaction (PPI) network of DEGs between FSH18/21 and FSH24 treatment.** Gene expression data was derived from RNA-Sequencing analysis described in [Supplementary Fig. S8](#). (a) The PPI network consisted of 46 nodes and 111 edges. PPI enrichment *P*-value: 0.000416. (b) GO cellular component terms enriched. Only *Transcription factor AP-1 complex* was enriched significantly.
