# Supplementary material
Source: PubMed Central journal article supplement (PMC8213452)
Supplement: deab135_supplementary_figure_s10.pdf [file deab135_supplementary_figure_s10.pdf]

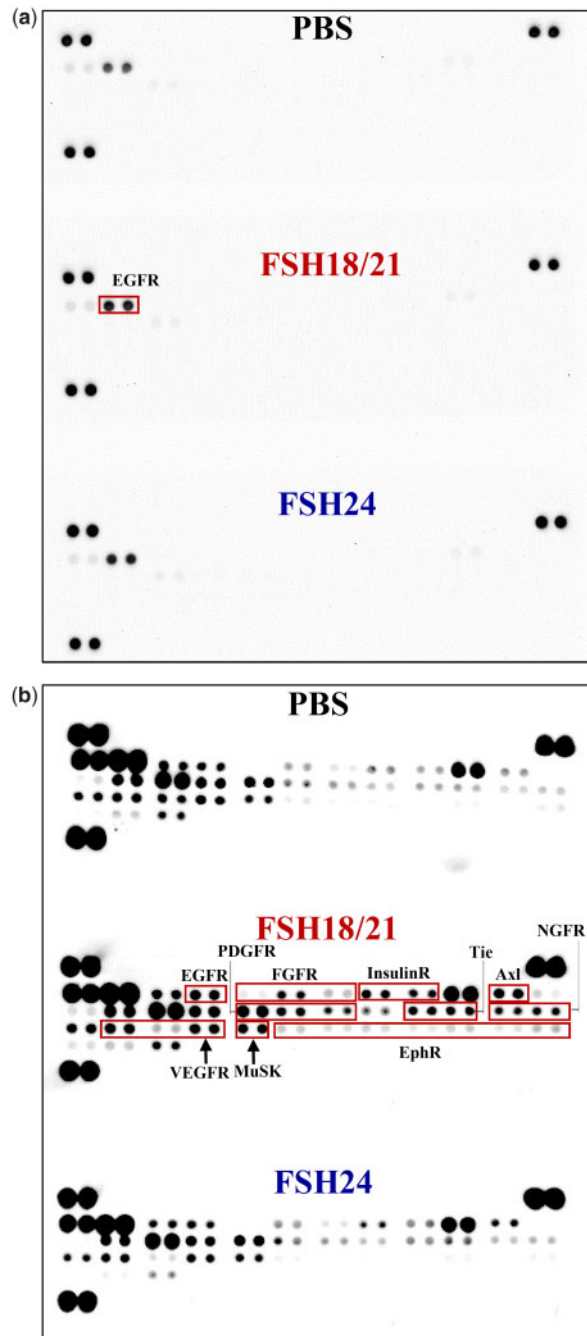

**Supplementary Figure S10. Transactivation of receptor tyrosine kinases (RTKs) by different FSH glycoforms.** Mice were injected i.p. with PBS, or 1  $\mu$ g of either FSH18/21, or FSH24 for 2 h. One ovary was collected from each mouse and total protein was extracted separately. Proteins from each group (n = 5) were pooled. Each pool contained a total of 1 mg protein. RTK assays were performed as described by the manufacturer. Each RTK is represented in duplicate on the array. (a) Chemiluminescent film image of a short time exposure. (b) Chemiluminescent film image of a longer exposure. Red boxes indicate different intensities of the RTK spots.
