# Supplementary material
Source: PubMed Central journal article supplement (PMC8213452)
Supplement: deab135_supplementary_figure_s11.pdf [file deab135_supplementary_figure_s11.pdf]

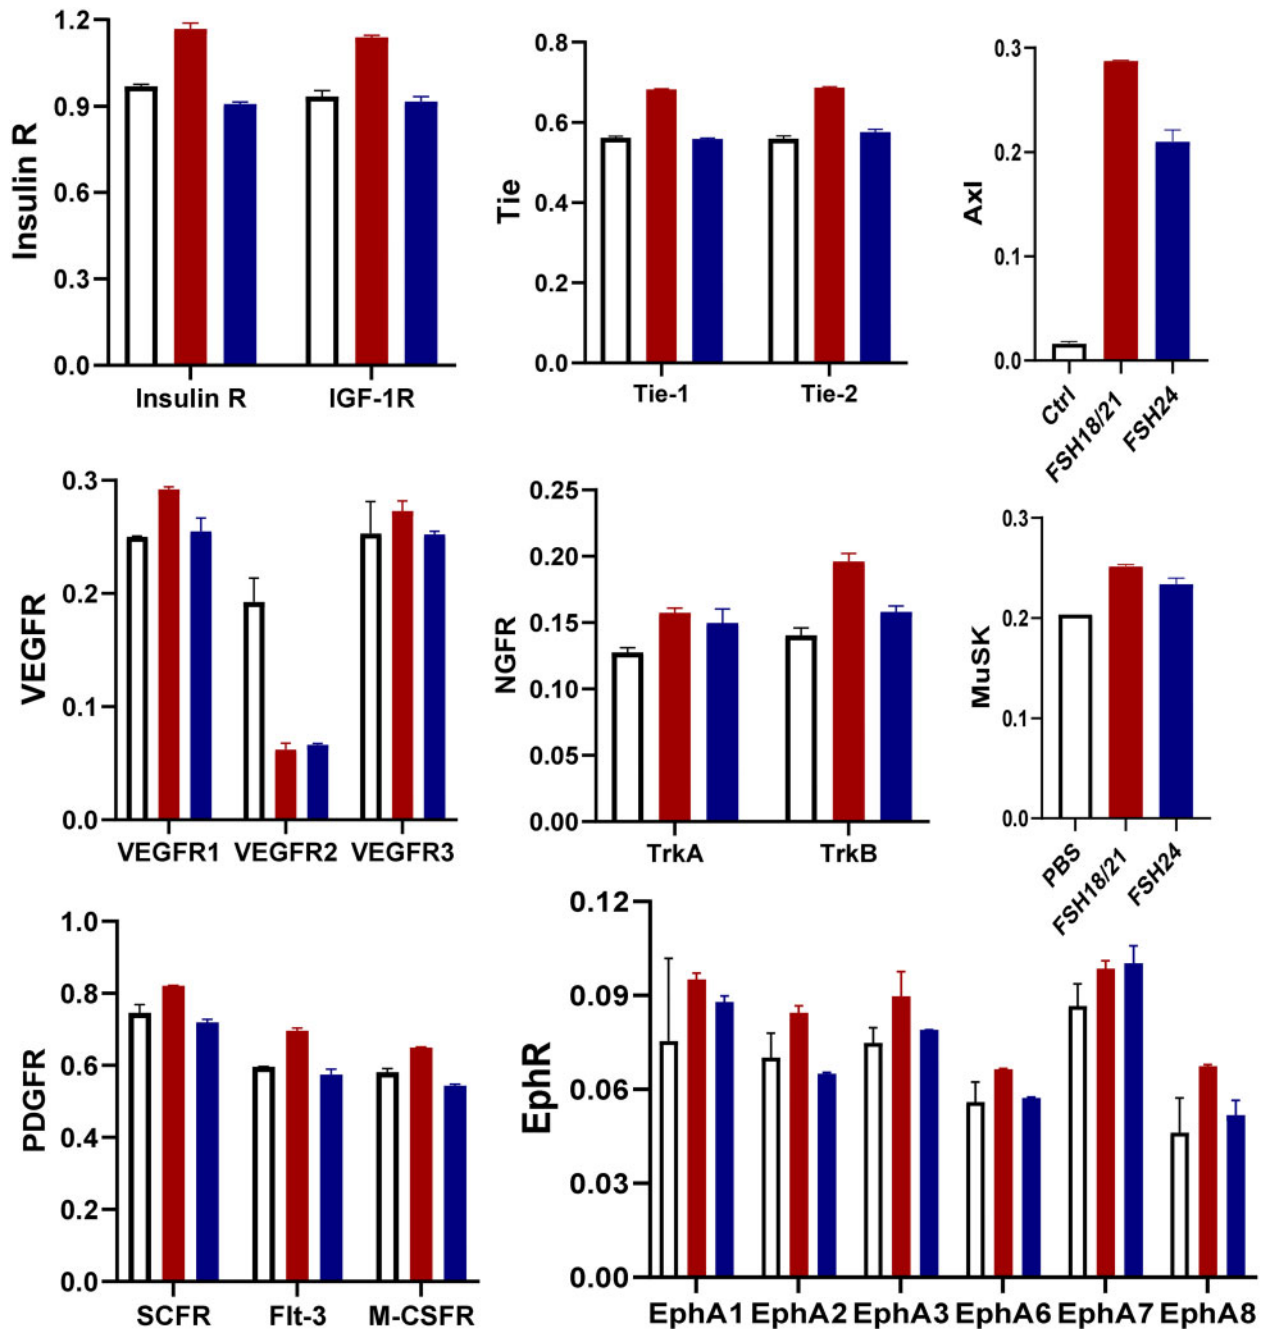

**Supplementary Figure S11. Quantification of receptor tyrosine kinases(RTKs) intensity induced by hypo and fully glycosylated FSH.** Mice were injected i.p. with PBS, or 1 µg of either FSH18/21, or FSH24 for 2 h. One ovary was collected from each mouse and total protein was extracted separately. Proteins from each group (n = 5) were pooled. Each pool contained a total of 1 mg protein. RTK assays were performed as described by the manufacturer. Expression of each RTK was calculated from the duplicates and normalized to the control spot of each array. Red bar indicated FSH18/21 treatment. Blue bar indicated FSH24 treatment. Each bars represent means ± SEM.
