# Supplementary material
Source: PubMed Central journal article supplement (PMC8213452)
Supplement: deab135_supplementary_figure_s12.pdf [file deab135_supplementary_figure_s12.pdf]

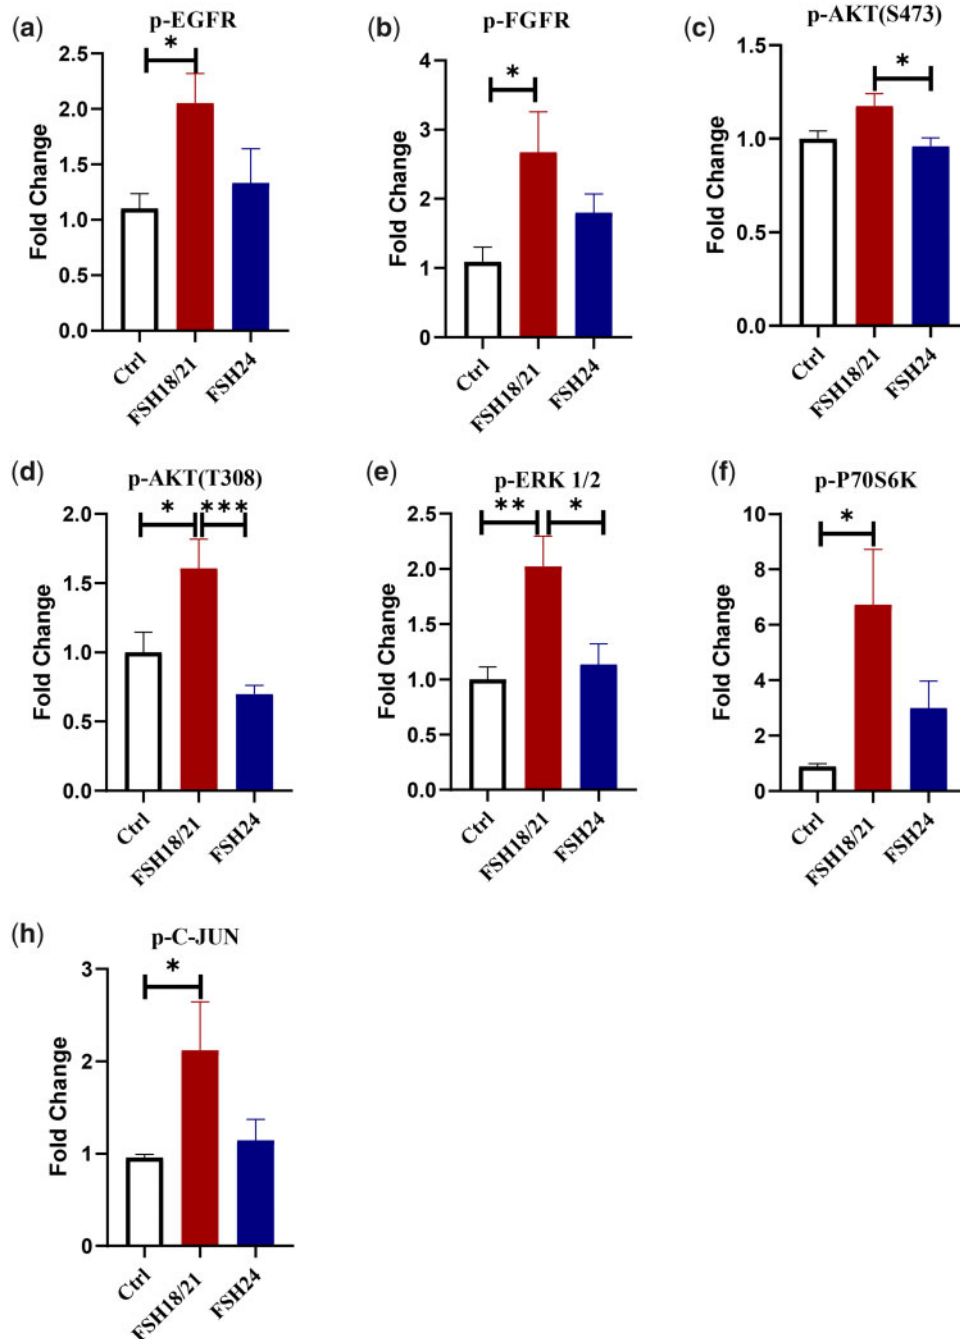

**Supplementary Figure S12. Western blotting quantification data showing the activation of receptor tyrosine kinases (RTKs) and downstream pathways.** Mice were injected i.p. with PBS, or 1  $\mu$ g of either FSH18/21, or FSH24 for 2 h. One ovary was collected from each mouse and total protein was extracted separately. Each bar represents the mean  $\pm$  SEM of 10 repeated mice ovaries samples. \* $P < 0.05$ ; \*\* $P < 0.01$ ; \*\*\* $P < 0.001$ .
