# Supplementary material
Source: PubMed Central journal article supplement (PMC8213452)
Supplement: deab135_supplementary_figure_s13.pdf [file deab135_supplementary_figure_s13.pdf]

human reproduction SUPPLEMENTARY DATA

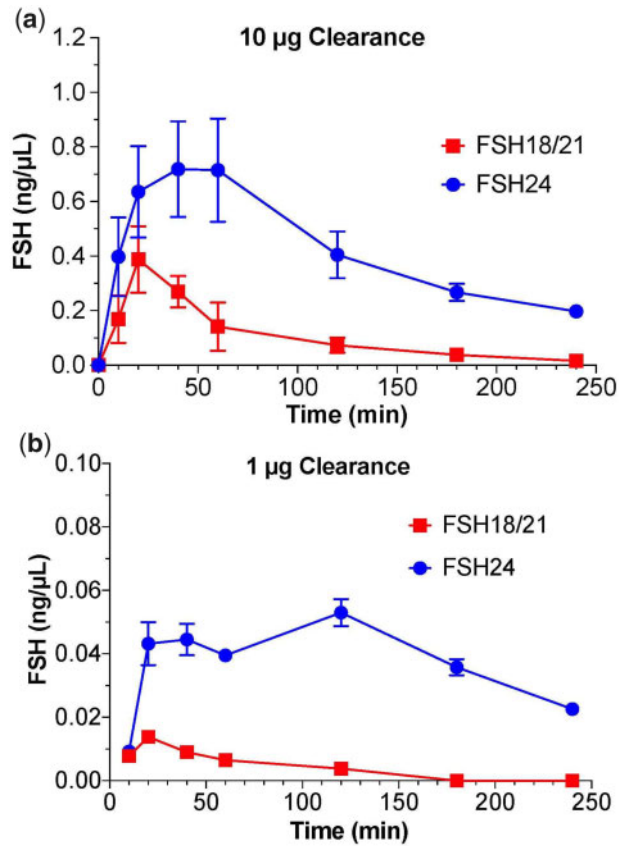

**Supplementary Figure S13. Clearance analysis of hypo- and fully-glycosylated FSH.** (a) Recombinant FSH18/21 and FSH24 preparation uptake and clearance patterns following intraperitoneal injection of 10 µg samples. (b) Recombinant FSH18/21 and FSH24 preparation uptake and clearance patterns following intraperitoneal injection of 1 µg samples. Each bar represents the means ± SEM of at least three mice.
