# Supplementary material
Source: PubMed Central journal article supplement (PMC8213452)
Supplement: deab135_supplementary_table_s1.pdf [file deab135_supplementary_table_s1.pdf]

**Supplementary Table S1** Characteristics of antibodies used for western blot and microscopy.

| Antibody name                     | Dilution | Source     | Supplier (distributor, town, country)  | Cat. No   |
|-----------------------------------|----------|------------|----------------------------------------|-----------|
| Bcl2                              | 1:1000   | Rabbit mAb | Cell Signaling (Danvers, MA, USA)      | 3498      |
| Bax                               | 1:1000   | Rabbit mAb | Cell Signaling (Danvers, MA, USA)      | 14796     |
| Cleaved Caspase-3                 | 1:100    | Rabbit mAb | Cell Signaling (Danvers, MA, USA)      | 9579      |
| Cyclin D1                         | 1:1000   | Rabbit mAb | Cell Signaling (Danvers, MA, USA)      | 2978      |
| phospho-P44/42 MAPK (T202/Y204)   | 1:1000   | Rabbit mAb | Cell Signaling (Danvers, MA, USA)      | 4370      |
| Phospho-AKT (Ser473)              | 1:1000   | Rabbit pAb | Cell Signaling (Danvers, MA, USA)      | 9271      |
| Phospho-AKT (Thr308)              | 1:1000   | Rabbit pAb | Cell Signaling (Danvers, MA, USA)      | 9275      |
| Phospho-EGF Receptor (Tyr1068)    | 1:1000   | Rabbit mAb | Cell Signaling (Danvers, MA, USA)      | 3777      |
| Phospho-FGF Receptor (Tyr653/654) | 1:1000   | Rabbit pAb | Cell Signaling (Danvers, MA, USA)      | 3471      |
| Phospho-p70S6 Kinase (Thr389)     | 1:1000   | Rabbit mAb | Cell Signaling (Danvers, MA, USA)      | 9234      |
| Phospho-p38 MAPK (Thr180/Tyr182)  | 1:1000   | Rabbit mAb | Cell Signaling (Danvers, MA, USA)      | 4511      |
| $\beta$ -actin                    | 1:5000   | Mouse pAb  | MilliporeSigma (Burlington, MA, USA)   | A5316     |
| Ki67                              | 1:300    | Rabbit pAb | Abcam (Cambridge, UK)                  | ab833     |
| Anti-Rabbit, HRP-linked           | 1:10000  |            | Jackson Research (West Grove, PA, USA) | 111035003 |
| Anti-mouse, HRP-linked            | 1:10000  |            | Jackson Research (West Grove, PA, USA) | 115035205 |
| Alexa Fluor 488                   | 1:300    | Donkey     | Invitrogen (Carlsbad, CA, USA)         | A32790    |
