# Supplementary material
Source: PubMed Central journal article supplement (PMC8213452)
Supplement: deab135_supplementary_table_s2.pdf [file deab135_supplementary_table_s2.pdf]

Supplementary Table SII qRT-PCR primers.

| Gene                     | Primer sequence         |
|--------------------------|-------------------------|
| <i>Cyp19a1</i> -Forward  | TCGGCATGCATGAGAACGGCA   |
| <i>Cyp19a1</i> -Reverse  | CAGGGCCCCGTCAGAGCTTTCAT |
| <i>Egr1</i> -Forward     | TCGGCTCCTTTCCTCACTCA    |
| <i>Egr1</i> -Reverse     | CTCATAGGGTTGTTGCTCGG    |
| <i>Fos</i> -Forward      | CGGGTTTCAACGCCGACTA     |
| <i>Fos</i> -Reverse      | TTGGCACTAGAGACGGACAGA   |
| <i>Inhbb</i> -Forward    | CTTCGTCTCTAATGAAGGCAACC |
| <i>Inhbb</i> -Reverse    | CTCCACCACATTCCACCTGTC   |
| <i>Gapdh</i> -Forward    | AGGTCGGTGTGAACGGATTTG   |
| <i>Gapdh</i> -Reverse    | TGTAGACCATGTAGTTGAGGTCA |
| <i>Rpl19</i> Forward     | GCGTGCTTCCTTGGTCTTAG    |
| <i>Rpl19</i> -Reverse    | CATGGAACACATCCACAAGC    |
| <i>Caspase3</i> -Forward | CATAAGAGCACTGGAATGTC    |
| <i>Caspase3</i> -Reverse | GCTCCTTTTGCTATGATCTTC   |
| <i>Bcl2</i> -Forward     | ATGACTGAGTACCTGAACC     |
| <i>Bcl2</i> -Reverse     | ATATAGTTCCACAAGGCATC    |
| <i>Bax</i> -Forward      | CCTTTTTGCTACAGGGTTTC    |
| <i>Bax</i> -Reverse      | ATATTGCTGTCGAGTTCATC    |
| <i>Pcna</i> -Forward     | CTGAGGTACCTGAACTTTTTC   |
| <i>Pcna</i> -Reverse     | TATACTCTACAACAAGGGGC    |
