# Supplementary material
Source: PubMed Central journal article supplement (PMC8213452)
Supplement: deab135_supplementary_table_s3.pdf [file deab135_supplementary_table_s3.pdf]

**Supplementary Table SIII Pathways enriched with differentially expressed genes (DEGs) from FSHI 8/21 versus Control.**

| Category     | Description                                                              | FDR value | Term name  |
|--------------|--------------------------------------------------------------------------|-----------|------------|
| GO component | Extracellular region                                                     | 3.40E-04  | GO.0005576 |
|              | Extracellular space                                                      | 3.40E-04  | GO.0005615 |
|              | Cell                                                                     | 3.40E-04  | GO.0005623 |
|              | Transcription factor complex                                             | 3.40E-04  | GO.0005667 |
|              | Transcription factor AP-1 complex                                        | 3.40E-04  | GO.0035976 |
| GO function  | DNA-binding transcription factor activity, RNA polymerase II-specific    | 1.67E-07  | GO.0000981 |
|              | DNA-binding transcription activator activity, RNA polymerase II-specific | 1.67E-07  | GO.0001228 |
|              | DNA-binding transcription factor activity                                | 1.67E-07  | GO.0003700 |
|              | Signaling receptor binding                                               | 1.67E-07  | GO.0005102 |
|              | Protein binding                                                          | 1.67E-07  | GO.0005515 |
| GO process   | Response to stimulus                                                     | 1.58E-14  | GO.0050896 |
|              | Response to organic substance                                            | 6.61E-14  | GO.0010033 |
|              | Response to chemical                                                     | 2.25E-13  | GO.0042221 |
|              | Signal transduction                                                      | 3.25E-13  | GO.0007165 |
|              | Cellular response to stimulus                                            | 8.81E-13  | GO.0051716 |

GO, gene ontology.
