# Supplementary material
Source: PubMed Central journal article supplement (PMC8213452)
Supplement: deab135_supplementary_table_s4.pdf [file deab135_supplementary_table_s4.pdf]

**Supplementary Table SIV Pathways enriched with differentially expressed genes (DEGs) from FSH24 versus Control.**

| Category     | Description                      | FDR value | Term name  |
|--------------|----------------------------------|-----------|------------|
| GO component | Cell periphery                   | 1.65E–14  | GO.0071944 |
|              | Plasma membrane                  | 9.54E–14  | GO.0005886 |
|              | Cell                             | 6.33E–12  | GO.0005623 |
|              | Extracellular region             | 9.26E–12  | GO.0005576 |
|              | Plasma membrane part             | 9.26E–12  | GO.0044459 |
| GO function  | Signaling receptor binding       | 2.43E–16  | GO.0005102 |
|              | Protein binding                  | 1.60E–12  | GO.0005515 |
|              | Receptor regulator activity      | 3.11E–12  | GO.0030545 |
|              | Binding                          | 8.65E–12  | GO.0005488 |
|              | Receptor ligand activity         | 1.70E–11  | GO.0048018 |
| GO process   | Cell communication               | 1.06E–24  | GO.0007154 |
|              | Multicellular organismal process | 1.06E–24  | GO.0032501 |
|              | Response to stimulus             | 1.06E–24  | GO.0050896 |
|              | Signaling                        | 1.14E–24  | GO.0023052 |
|              | Cellular response to stimulus    | 2.62E–22  | GO.0051716 |

GO, gene ontology.
