# Supplementary material
Source: PubMed Central journal article supplement (PMC8213452)
Supplement: deab135_supplementary_table_s5.pdf [file deab135_supplementary_table_s5.pdf]

**Supplementary Table SV Pathways enriched with differentially expressed genes (DEGs) from FSH18/21 versus FSH24.**

| Category     | Description                                                              | FDR value | Term name  |
|--------------|--------------------------------------------------------------------------|-----------|------------|
| GO component | Terminal bouton                                                          | 0.0016    | GO.0043195 |
|              | Transcription factor AP-1 complex                                        | 0.0074    | GO.0035976 |
| GO function  | DNA-binding transcription factor activity                                | 2.55E-05  | GO.0003700 |
|              | DNA-binding transcription factor activity, RNA polymerase II-specific    | 5.53E-05  | GO.0000981 |
|              | Sequence-specific DNA binding                                            | 1.30E-04  | GO.0043565 |
|              | Carboxylic acid binding                                                  | 2.70E-04  | GO.0031406 |
|              | RNA polymerase II proximal promoter sequence-specific DNA binding        | 3.70E-04  | GO.0000978 |
|              | RNA polymerase II regulatory region sequence-specific DNA binding        | 4.50E-04  | GO.0000977 |
|              | DNA-binding transcription activator activity, RNA polymerase II-specific | 6.80E-04  | GO.0001228 |
|              | Galactoside 2-alpha-L-fucosyltransferase activity                        | 7.50E-04  | GO.0008107 |
| GO process   | Transcription, DNA-templated                                             | 0.0205    | GO.0006351 |
|              | Response to external stimulus                                            | 0.0205    | GO.0009605 |
|              | Response to endogenous stimulus                                          | 0.0205    | GO.0009719 |
|              | Response to hormone                                                      | 0.0205    | GO.0009725 |
|              | Positive regulation of cellular biosynthetic process                     | 0.0205    | GO.0031328 |
|              | Response to cAMP                                                         | 0.0221    | GO.0051591 |

GO, gene ontology.
